# Supplementary material
Source: publisher figshare collection journal article supplement (https://acs.figshare.com/ndownloader/files/4126246)
Supplement: Supplementary file 1 [file 4126246]

## **SUPPLEMENTARY DATA**

### **SUPPLEMENTARY FIGURE LEGENDS:**

**Figure S1** (A) Highest occupied molecular orbital and (B) Lowest free molecular orbital of compound **1**.

**Figure S2** Dose-response curves of the compound **1** and aflatoxin B<sub>1</sub> cytotoxic response as tested with MTT assays analysed at 570 nm. (A) compound **1**; (B) aflatoxin B<sub>1</sub>.

**Table S1** Physicochemical Parameters of the Different Types of Water <sup>x</sup>

| Parameter  | AcidEW                    | NEW                     | AlkEW                     | TW                      | DW                      |
|------------|---------------------------|-------------------------|---------------------------|-------------------------|-------------------------|
| pH         | 2.5±0.14 <sup>a</sup>     | 5.6±0.5 <sup>b</sup>    | 11.6±0.2 <sup>c</sup>     | 7.67±0.1 <sup>d</sup>   | 6.8±0.2 <sup>c</sup>    |
| ORP (mv)   | 1117.3±25.4 <sup>a</sup>  | 836.4±78.3 <sup>b</sup> | -872.0±31.1 <sup>d</sup>  | 535.9±93.0 <sup>c</sup> | 494.6±32.6 <sup>c</sup> |
| DO (% sat) | 114.5±25.9 <sup>a</sup>   | 107.8±3.4 <sup>a</sup>  | 43.8±11.0 <sup>c</sup>    | 71.3±5.4 <sup>b</sup>   | 50.5±7.4 <sup>b,c</sup> |
| EC (μs/cm) | 2162.5±311.7 <sup>a</sup> | 559.7±30.5 <sup>b</sup> | 2038.5±322.8 <sup>a</sup> | 488.5±87.3 <sup>b</sup> | 9.6±1.0 <sup>c</sup>    |
| ACC (mg/L) | 80.2±3.5 <sup>a</sup>     | 83.7±4.3 <sup>a</sup>   | / <sup>b</sup>            | [ND] <sup>y b</sup>     | ND <sup>z b</sup>       |

<sup>x</sup> Values represent the mean ± SD (n = 5); the observed temperature and atmospheric pressure were 23±2 °C and 760±3 mmHg, respectively.

<sup>y</sup> TW was the drinking water at China Agricultural University; the residue of chlorine was approximately 0.1 mg/L.

<sup>z</sup> ND, no detected chlorine via the iodometric titration method.

Different superscripts <sup>a, b, c, d and e</sup> indicating significant difference (p < 0.05) between the physicochemical properties (pH, ORP, DO, EC and ACC) of the different types of water.

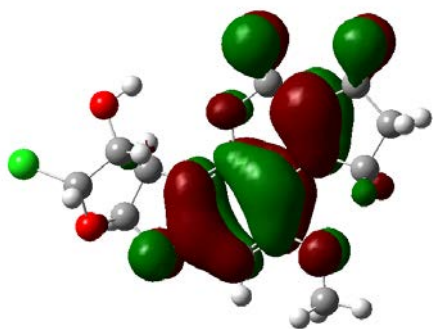

(a)

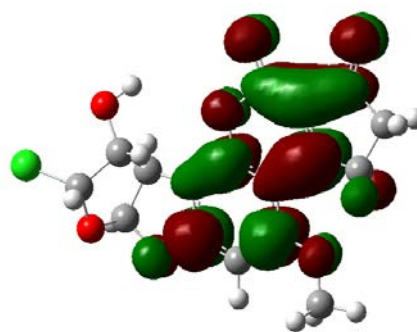

(b)

Figure S1 Ke Xiong et al.

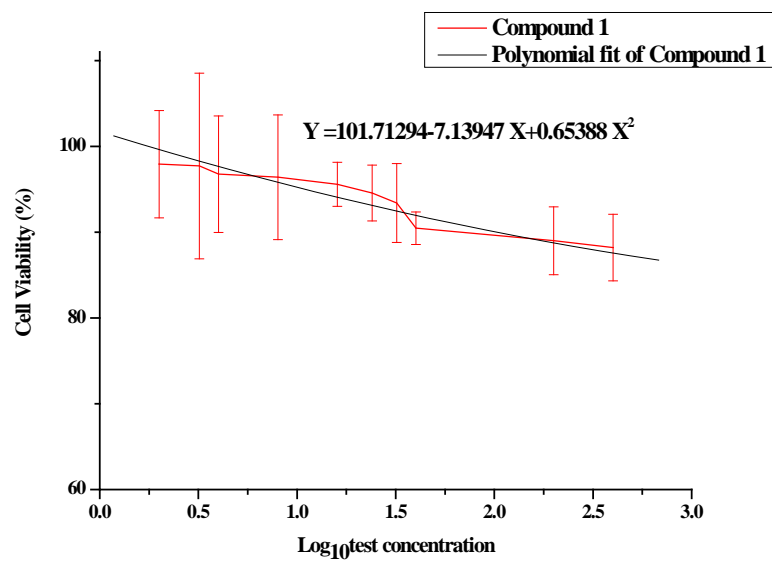

(A)

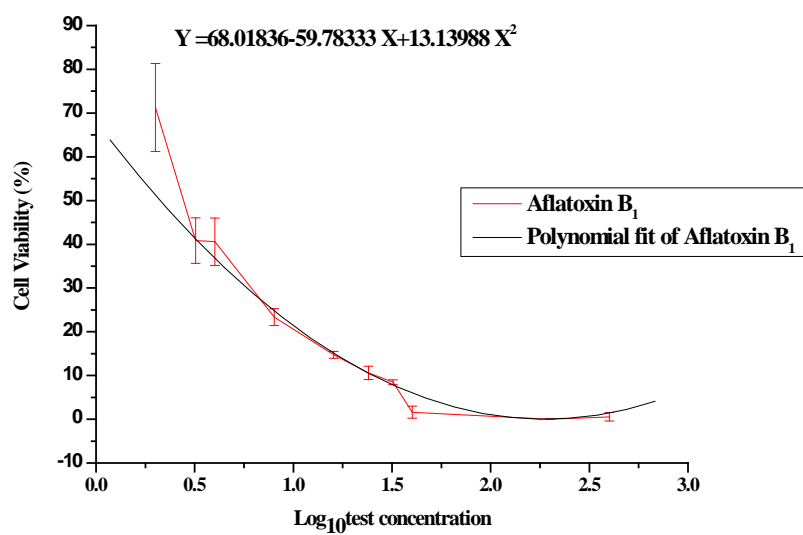

(B)

Figure S2 Ke Xiong et al.
